# Supplementary material for: Synthesis of magnetic nanoflower immobilized lipase and its continuous catalytic application
Source: Royal Society of Chemistry journal article supplement (doi:10.1039/c8nj06429f), 2019-01-01
Supplement: c8nj06429f1.pdf [file c8nj06429f1.pdf]

### Supporting Information

**Fig. S1.** standard curve of p-NP

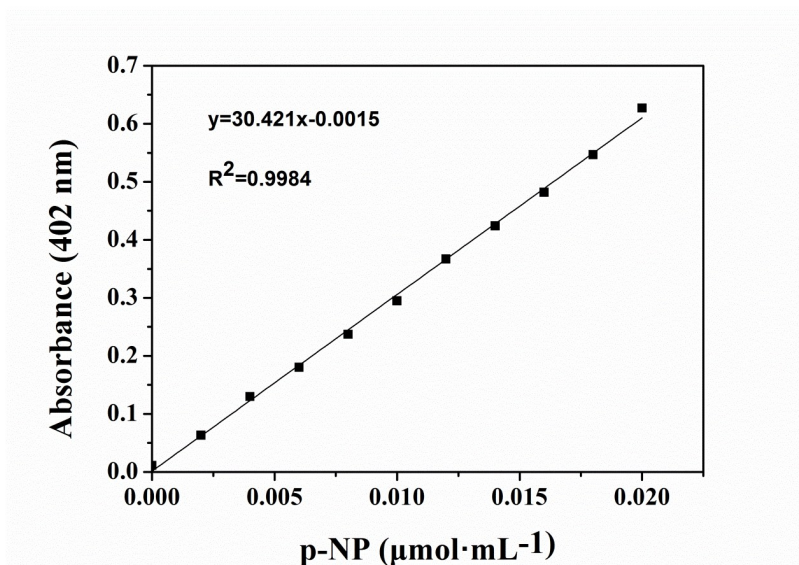

**Fig. S2.** TGA of lipase@MNFs

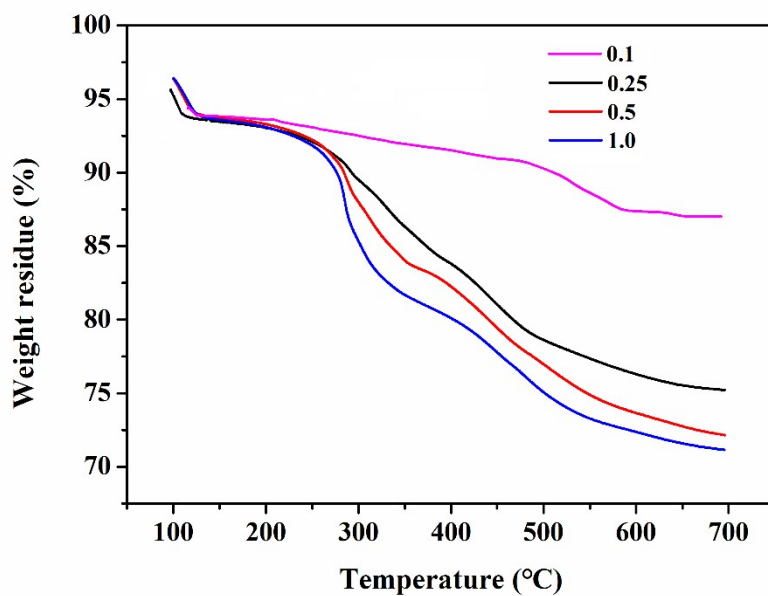

**Table S1.** The weight percent, enzyme recovery and enzymatic activity of lipase of lipase@MNFs

| Enzyme concentration (mg/ml) | The weight percent of enzyme (%) | Enzyme activity (U/g) | Enzyme recovery (%) |
|------------------------------|----------------------------------|-----------------------|---------------------|
| 0.1                          | 6.49                             | 73.48±4.53            | 46.69               |
| 0.25                         | 17.81                            | 82.34±2.218           | 58.97               |
| 0.5                          | 21.15                            | 92.63±2.69            | 39.80               |
| 1                            | 21.93                            | 89.16±4.21            | 19.96               |

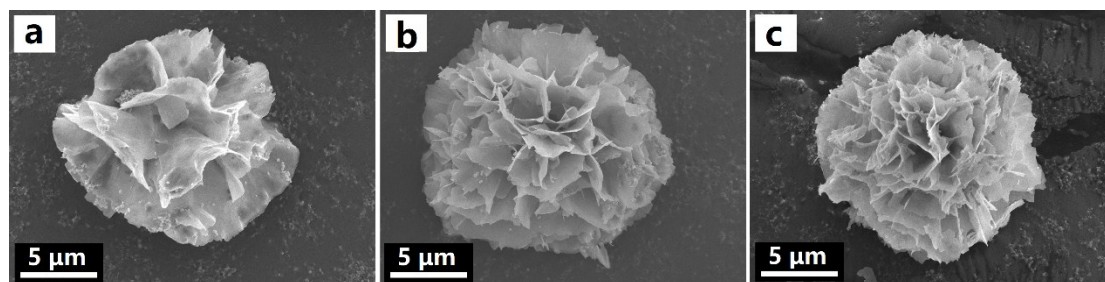

**Fig. S3.** SEM image of the lipase-Fe<sub>3</sub>O<sub>4</sub>-NFs synthesized with various time: (a) 1d, (b) 2 d, (c) 3d.

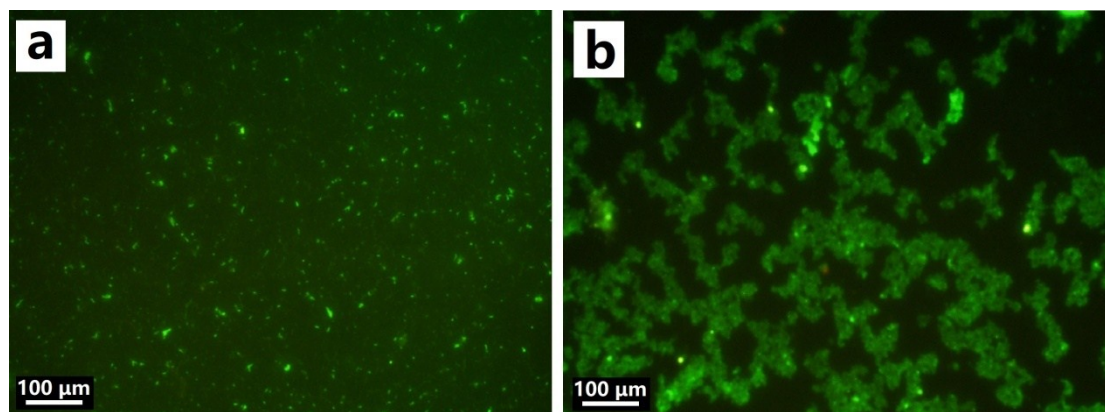

**Fig. S4** Fluorescence micrograph of lipase labeled by FITC anchored on synthesized amino functional magnetic nanoparticles (FN) and magnetic hybrid nanoflower

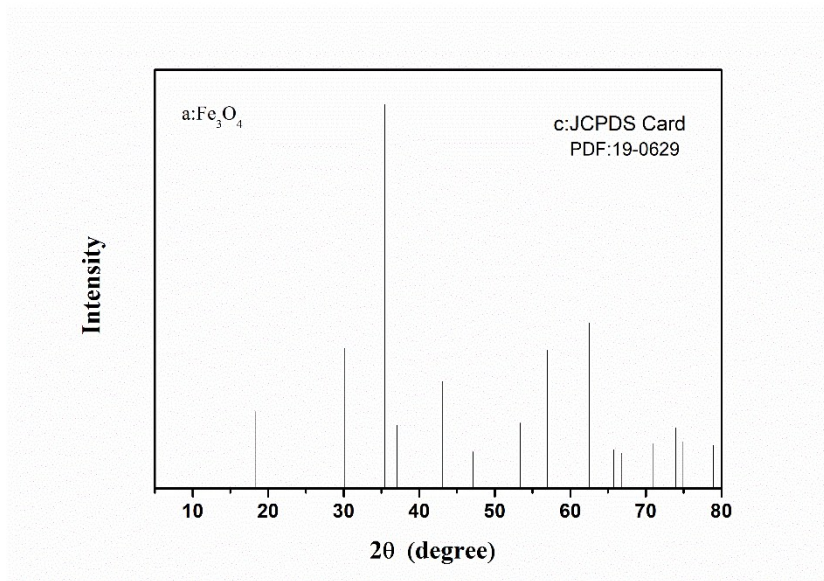

**Fig. S5.** XRD patterns of of Fe<sub>3</sub>O<sub>4</sub> JCPD Card No. 36-0203.
